# Supplementary material for: Artificial Intelligence in Fluorescence Lifetime Imaging Ophthalmoscopy (FLIO) Data Analysis—Toward Retinal Metabolic Diagnostics
Source: MDPI journal article supplement (doi:10.3390/diagnostics14040431), 2024-02-16
Supplement: s1 [file s1]

Supp. Table S2: Layer-wise evaluation results on OCT-A data: non-smokers vs. all smokers

| Layer                   | Mean TP | Mean FN | Mean FP | Mean TN | Mean TPR     | Mean FPR     | Mean Accuracy |
|-------------------------|---------|---------|---------|---------|--------------|--------------|---------------|
| Full                    | 29.5    | 24.5    | 32.4    | 19.6    | 54.63%±5.48% | 62.31%±6.27% | 46.32%±3.81%  |
| Vitreoretinal Interface | 39.6    | 14.4    | 31.85   | 20.15   | 73.33%±6.21% | 61.25%±4.18% | 56.37%±3.53%  |
| Retina                  | 28.2    | 25.8    | 26.55   | 25.45   | 52.22%±3.64% | 51.06%±7.63% | 50.61%±3.92%  |
| SVC                     | 21.25   | 32.75   | 27.9    | 24.1    | 39.35%±6.17% | 53.65%±5.80% | 42.78%±3.42%  |
| NFLVP                   | 35.7    | 18.3    | 33.6    | 18.4    | 66.11%±6.14% | 64.62%±4.14% | 51.04%±2.67%  |
| SVP                     | 19.45   | 34.55   | 28.25   | 23.75   | 36.02%±6.04% | 54.33%±5.44% | 40.75%±4.13%  |
| DVC                     | 35.65   | 18.35   | 22.65   | 29.35   | 66.02%±5.66% | 43.56%±5.58% | 61.32%±4.37%  |
| ICP                     | 24.85   | 29.15   | 29.25   | 22.75   | 46.02%±4.03% | 56.25%±4.78% | 44.91%±2.47%  |
| DCP                     | 38.1    | 15.9    | 18.1    | 33.9    | 70.56%±4.64% | 34.81%±6.96% | 67.92%±3.40%  |
| Avascular Complex       | 34.95   | 19.05   | 28.3    | 23.7    | 64.72%±5.02% | 54.42%±4.43% | 55.33%±3.38%  |
| CC                      | 33.55   | 20.45   | 26      | 26      | 62.13%±3.91% | 50.00%±2.98% | 56.18%±2.88%  |
| Choroid                 | 31.95   | 22.05   | 29.65   | 22.35   | 59.17%±5.81% | 57.02%±3.86% | 51.23%±3.44%  |
| HL                      | 35.7    | 18.3    | 37.65   | 14.35   | 66.11%±7.90% | 72.40%±5.21% | 47.22%±4.18%  |
| ILMtoBM                 | 31.9    | 22.1    | 27.4    | 24.6    | 59.07%±3.70% | 52.69%±4.10% | 53.30%±2.50%  |
| SL                      | 31.65   | 22.35   | 34      | 18      | 58.61%±9.30% | 65.38%±4.47% | 46.84%±4.01%  |

Full: all layers, SVC: supeficial vasular complex, NVLVP: nerve fiber layer vascular plexus, SVP: superficial vascular plexus, DVC: deep vascular complex, ICP: intermediate capillary plexus, DCP: deep capillary plexus, avascular complex, CC: choriocapillaris, choroid, HL: Haller's layer, ILMtoBM: internal limiting membrane to Bruch membrane, SL: Sattlers's layer
