# Supplementary material for: Artificial Intelligence in Fluorescence Lifetime Imaging Ophthalmoscopy (FLIO) Data Analysis—Toward Retinal Metabolic Diagnostics
Source: MDPI journal article supplement (doi:10.3390/diagnostics14040431), 2024-02-16
Supplement: s1 [file s1]

**Supp. Table S4: Layer-wise evaluation results on OCT-A data : non-smokers vs. light smokers (cumulative pack count < 2,500)**

| Layer                   | Mean TP | Mean FN | Mean FP | Mean TN | Mean TPR    | Mean FPR    | Mean Accuracy |
|-------------------------|---------|---------|---------|---------|-------------|-------------|---------------|
| Full                    | 0       | 26      | 0.4     | 51.6    | 0.00%±0.00% | 0.77%±1.86% | 66.15%±1.24%  |
| Vitreoretinal Interface | 1.25    | 24.75   | 2.45    | 49.55   | 4.81%±3.82% | 4.71%±2.31% | 65.13%±2.31%  |
| Retina                  | 0       | 26      | 0.7     | 51.3    | 0.00%±0.00% | 1.35%±1.73% | 65.77%±1.15%  |
| SVC                     | 0.65    | 25.35   | 0.85    | 51.15   | 2.50%±3.05% | 1.63%±1.64% | 66.41%±1.75%  |
| NFLVP                   | 0.55    | 25.45   | 2.1     | 49.9    | 2.12%±2.85% | 4.04%±3.84% | 64.68%±2.73%  |
| SVP                     | 0.65    | 25.35   | 1.65    | 50.35   | 2.50%±2.79% | 3.17%±2.38% | 65.38%±2.07%  |
| DVC                     | 0.15    | 25.85   | 3.1     | 48.9    | 0.58%±1.37% | 5.96%±2.42% | 62.88%±1.49%  |
| ICP                     | 0       | 26      | 1.35    | 50.65   | 0.00%±0.00% | 2.60%±1.95% | 64.94%±1.30%  |
| DCP                     | 0       | 25      | 3.3     | 48.7    | 3.85%±3.85% | 6.35%±1.73% | 63.72%±1.72%  |
| Avascular Complex       | 1.8     | 24.2    | 2.7     | 49.3    | 6.92%±2.88% | 5.19%±2.36% | 65.51%±1.76%  |
| CC                      | 0.05    | 25.95   | 2.95    | 49.05   | 0.19%±0.84% | 5.67%±6.10% | 62.95%±3.99%  |
| Choroid                 | 0       | 26      | 1.35    | 50.65   | 0.00%±0.00% | 2.60%±1.10% | 64.94%±0.73%  |
| HL                      | 0       | 26      | 0.2     | 51.8    | 0.00%±0.00% | 0.38%±0.77% | 66.41%±0.51%  |
| ILMtoBM                 | 0       | 26      | 0.2     | 51.8    | 0.00%±0.00% | 0.38%±1.30% | 66.41%±0.87%  |
| SL                      | 0       | 26      | 0.3     | 51.7    | 0.00%±0.00% | 0.58%±1.73% | 66.28%±1.15%  |

Full: all layers, SVC: supeficial vasular complex, NVLVP: nerve fiber layer vascular plexus, SVP: superficial vascular plexus, DVC: deep vascular complex, ICP: intermediate capillary plexus, DCP: deep capillary plexus, avascular complex, CC: choriocapillaris, choroid, HL: Haller's layer, ILMtoBM: internal limiting membrane to Bruch membrane, SL: Sattlers's layer
