# Supplementary material for: Artificial Intelligence in Fluorescence Lifetime Imaging Ophthalmoscopy (FLIO) Data Analysis—Toward Retinal Metabolic Diagnostics
Source: MDPI journal article supplement (doi:10.3390/diagnostics14040431), 2024-02-16
Supplement: s1 [file s1]

| ID | Smoking    | Sex<br>(0: female,<br>1: male) | Age | Weight<br>(kg) | Height<br>(cm) | Iris color   | Lens   | Cigarette/<br>day | Smoking<br>year | Pack Year<br>(py) | Cumulative<br>pack<br>number |
|----|------------|--------------------------------|-----|----------------|----------------|--------------|--------|-------------------|-----------------|-------------------|------------------------------|
| 1  | non-smoker | female                         | 28  | 65             | 174            | brown        | phakic | 0                 | 0               | 0                 | 0                            |
| 2  | non-smoker | female                         | 23  | 69             | 170            | green        | phakic | 0                 | 0               | 0                 | 0                            |
| 3  | non-smoker | female                         | 29  | 68             | 170            | blue         | phakic | 0                 | 0               | 0                 | 0                            |
| 4  | non-smoker | male                           | 26  | 73             | 177            | blue         | phakic | 0                 | 0               | 0                 | 0                            |
| 5  | non-smoker | female                         | 29  | 60             | 174            | blue         | phakic | 0                 | 0               | 0                 | 0                            |
| 6  | non-smoker | female                         | 25  | 60             | 160            | green        | phakic | 0                 | 0               | 0                 | 0                            |
| 7  | non-smoker | male                           | 24  | 95             | 191            | brown, green | phakic | 0                 | 0               | 0                 | 0                            |
| 8  | non-smoker | male                           | 25  | 85             | 187            | brown        | phakic | 0                 | 0               | 0                 | 0                            |
| 9  | non-smoker | male                           | 21  | 65             | 176            | brown        | phakic | 0                 | 0               | 0                 | 0                            |
| 10 | non-smoker | female                         | 23  | 50             | 160            | brown        | phakic | 0                 | 0               | 0                 | 0                            |
| 11 | non-smoker | male                           | 31  | 95             | 180            | green        | phakic | 0                 | 0               | 0                 | 0                            |
| 12 | non-smoker | female                         | 24  | 65             | 173            | blue         | phakic | 0                 | 0               | 0                 | 0                            |
| 13 | non-smoker | female                         | 22  | 61             | 173            | blue         | phakic | 0                 | 0               | 0                 | 0                            |
| 14 | non-smoker | male                           | 28  | 89             | 184            | brown        | phakic | 0                 | 0               | 0                 | 0                            |
| 15 | non-smoker | female                         | 21  | 73             | 175            | blue         | phakic | 0                 | 0               | 0                 | 0                            |
| 16 | non-smoker | female                         | 30  | 64             | 165            | blue         | phakic | 0                 | 0               | 0                 | 0                            |
| 17 | non-smoker | male                           | 22  | 93             | 191            | blue         | phakic | 0                 | 0               | 0                 | 0                            |
| 18 | non-smoker | male                           | 24  | 73             | 190            | brown        | phakic | 0                 | 0               | 0                 | 0                            |
| 19 | non-smoker | male                           | 22  | 65             | 180            | brown        | phakic | 0                 | 0               | 0                 | 0                            |
| 20 | non-smoker | male                           | 33  | 104            | 196            | brown        | phakic | 0                 | 0               | 0                 | 0                            |
| 21 | non-smoker | female                         | 27  | 61             | 163            | green        | phakic | 0                 | 0               | 0                 | 0                            |
| 22 | non-smoker | male                           | 35  | 74             | 193            | blue         | phakic | 0                 | 0               | 0                 | 0                            |
| 23 | non-smoker | female                         | 27  | 54             | 160            | blue         | phakic | 0                 | 0               | 0                 | 0                            |
| 24 | non-smoker | male                           | 32  | 83             | 184            | green        | phakic | 0                 | 0               | 0                 | 0                            |
| 25 | non-smoker | female                         | 32  | 47             | 158            | brown        | phakic | 0                 | 0               | 0                 | 0                            |
| 26 | non-smoker | male                           | 31  | 85             | 194            | green        | phakic | 0                 | 0               | 0                 | 0                            |
| 27 | smoker     | female                         | 25  | 50             | 155            | blue         | phakic | 7                 | 10              | 3.5               | 1277.5                       |
| 28 | smoker     | female                         | 34  | 105            | 196            | brown        | phakic | 12.5              | 15              | 9.4               | 3421.9                       |
| 29 | somker     | male                           | 24  | 88             | 197            | blue         | phakic | 8                 | 5               | 2.0               | 730.0                        |
| 30 | smoker     | female                         | 22  | 63             | 175            | blue         | phakic | 7                 | 6               | 2.1               | 766.5                        |
| 31 | smoker     | male                           | 29  | 65             | 170            | green        | phakic | 3                 | 10              | 1.5               | 547.5                        |
| 32 | smoker     | male                           | 26  | 76             | 179            | green        | phakic | 20.5              | 12              | 12.3              | 4489.5                       |
| 33 | somker     | male                           | 20  | 89             | 194            | blue         | phakic | 10                | 4.5             | 2.3               | 821.3                        |
| 34 | smoker     | male                           | 30  | 112            | 200            | brown        | phakic | 8                 | 14.5            | 5.8               | 2117.0                       |
| 35 | smoker     | female                         | 25  | 71             | 163            | green        | phakic | 15                | 11              | 8.3               | 3011.3                       |
| 36 | smoker     | female                         | 24  | 58             | 160            | brown        | phakic | 10                | 9               | 4.5               | 1642.5                       |
| 37 | somker     | male                           | 25  | 75             | 187            | green        | phakic | 20                | 9.5             | 9.5               | 3467.5                       |
| 38 | smoker     | female                         | 37  | 52             | 154            | brown        | phakic | 12.5              | 20              | 12.5              | 4562.5                       |
| 39 | smoker     | male                           | 35  | 115            | 177            | green        | phakic | 25                | 17              | 21.3              | 7756.3                       |
| 40 | smoker     | male                           | 27  | 193            | 68             | brown        | phakic | 15                | 12              | 9.0               | 3285.0                       |
| 41 | somker     | female                         | 26  | 100            | 166            | blue, green  | phakic | 5                 | 5               | 1.3               | 456.3                        |
| 42 | smoker     | male                           | 35  | 74.6           | 179            | blue         | phakic | 22                | 19              | 20.9              | 7628.5                       |
| 43 | smoker     | female                         | 32  | 95             | 163            | brown        | phakic | 8                 | 16              | 6.4               | 2336.0                       |
| 44 | smoker     | male                           | 30  | 90             | 182            | blue         | phakic | 5.5               | 12              | 3.3               | 1204.5                       |
| 45 | somker     | male                           | 25  | 86             | 173            | brown        | phakic | 6                 | 8               | 2.4               | 876.0                        |
| 46 | smoker     | male                           | 24  | 70             | 173            | brown        | phakic | 20                | 10              | 10.0              | 3650.0                       |
| 47 | smoker     | female                         | 24  | 90             | 163            | blue         | phakic | 22.5              | 8               | 9.0               | 3285.0                       |
| 48 | smoker     | female                         | 36  | 66.5           | 168            | brown        | phakic | 13.5              | 23              | 15.5              | 5666.6                       |
| 49 | somker     | male                           | 32  | 112            | 190            | blue, green  | phakic | 25                | 17              | 21.3              | 7756.3                       |
| 50 | smoker     | male                           | 36  | 64             | 167            | brown        | phakic | 12.5              | 20              | 12.5              | 4562.5                       |
| 51 | smoker     | male                           | 30  | 95             | 186            | blue         | phakic | 9                 | 10.5            | 4.7               | 1724.6                       |
| 52 | smoker     | female                         | 26  | 77             | 159            | brown        | phakic | 5.5               | 9               | 2.5               | 903.4                        |
| 53 | somker     | female                         | 29  | 75             | 163            | green        | phakic | 5                 | 9               | 2.3               | 821.3                        |
| 54 | smoker     | female                         | 31  | 85             | 180            | blue         | phakic | 12.5              | 12.5            | 7.8               | 2851.6                       |
