# Supplementary material for: Artificial Intelligence in Fluorescence Lifetime Imaging Ophthalmoscopy (FLIO) Data Analysis—Toward Retinal Metabolic Diagnostics
Source: MDPI journal article supplement (doi:10.3390/diagnostics14040431), 2024-02-16
Supplement: s1 [file s1]

**Supp. Table S3: Layer-wise evaluation results on OCT-A data: non-smokers vs. heavy smokers (cumulative pack count ≥ 2,500)**

| Layer                   | Mean TP | Mean FN | Mean FP | Mean TN | Mean TPR     | Mean FPR     | Mean Accuracy |
|-------------------------|---------|---------|---------|---------|--------------|--------------|---------------|
| Full                    | 11.15   | 16.85   | 22.3    | 29.7    | 39.82%±7.51% | 42.88%±4.75% | 51.06%±4.11%  |
| Vitreoretinal Interface | 18.6    | 9.4     | 21.05   | 30.95   | 66.43%±6.53% | 40.48%±4.57% | 61.94%±3.15%  |
| Retina                  | 9.15    | 18.85   | 24.35   | 27.65   | 32.68%±6.42% | 46.83%±5.41% | 46.00%±4.14%  |
| SVC                     | 10.1    | 17.9    | 18.2    | 33.8    | 36.07%±7.40% | 35.00%±4.62% | 54.87%±4.14%  |
| NFLVP                   | 14.25   | 13.75   | 18.55   | 33.45   | 50.89%±6.48% | 35.67%±4.73% | 59.63%±3.01%  |
| SVP                     | 9.7     | 18.3    | 17.6    | 34.4    | 34.64%±9.18% | 33.85%±4.65% | 55.12%±4.16%  |
| DVC                     | 11.8    | 16.2    | 18.25   | 33.75   | 42.14%±6.74% | 35.10%±3.84% | 56.94%±3.70%  |
| ICP                     | 6.1     | 21.9    | 21.85   | 30.15   | 21.79%±7.04% | 42.02%±6.03% | 45.31%±5.12%  |
| DCP                     | 14.25   | 13.75   | 14.05   | 37.95   | 50.89%±7.73% | 27.02%±4.01% | 65.25%±3.48%  |
| Avascular Complex       | 13.35   | 14.65   | 18.05   | 33.95   | 47.68%±6.51% | 34.71%±3.41% | 59.13%±2.41%  |
| CC                      | 9.6     | 18.4    | 22.55   | 29.45   | 34.29%±5.80% | 43.37%±3.77% | 48.81%±3.17%  |
| Choroid                 | 10.4    | 17.6    | 16.35   | 35.65   | 37.14%±6.33% | 31.44%±4.05% | 57.56%±4.43%  |
| HL                      | 9.6     | 18.4    | 24.3    | 27.7    | 34.29%±5.46% | 46.73%±5.44% | 46.62%±4.35%  |
| ILMtoBM                 | 16.5    | 11.5    | 18.65   | 33.35   | 58.93%±4.72% | 35.87%±5.21% | 62.31%±3.86%  |
| SL                      | 12      | 16      | 21.95   | 30.05   | 42.86%±6.39% | 42.21%±4.92% | 52.56%±4.32%  |

Full: all layers, SVC: supeficial vasular complex, NVLVP: nerve fiber layer vascular plexus, SVP: superficial vascular plexus, DVC: deep vascular complex, ICP: intermediate capillary plexus, DCP: deep capillary plexus, avascular complex, CC: choriocapillaris, choroid, HL: Haller's layer, ILMtoBM: internal limiting membrane to Bruch membrane, SL: Sattlers's layer
